# Supplementary material
Source: MDPI journal article supplement (https://www.mdpi.com/2673-4591/10/1/35)
Supplement: s1 [file s1]

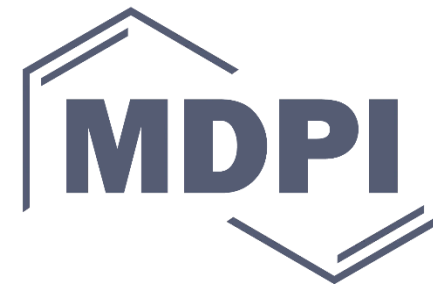

# Displacement Sensing of an Active String Actuator by an Optical Fiber

Wei-Hang Tian, Shuichi Wakimoto, Kazuya Nagaoka,  
Yorifumi Yoshimoto, Takefumi Kanda, Yamaguchi Daisuke

*Graduate School of Natural Science and Technology,  
Okayama University, Okayama, Japan*

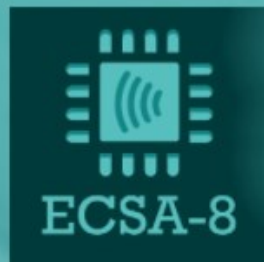

**The 8th International Electronic Conference on  
Sensors and Applications**

**01-15 NOVEMBER 2021 | ONLINE**

# Thin Artificial Muscle

**High flexibility** and **lightweight** pneumatic actuator  
with **1.8 mm** in outer diameter

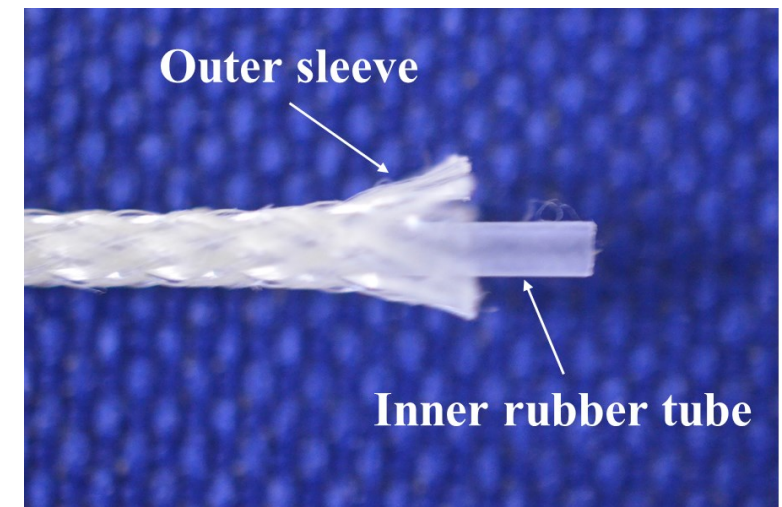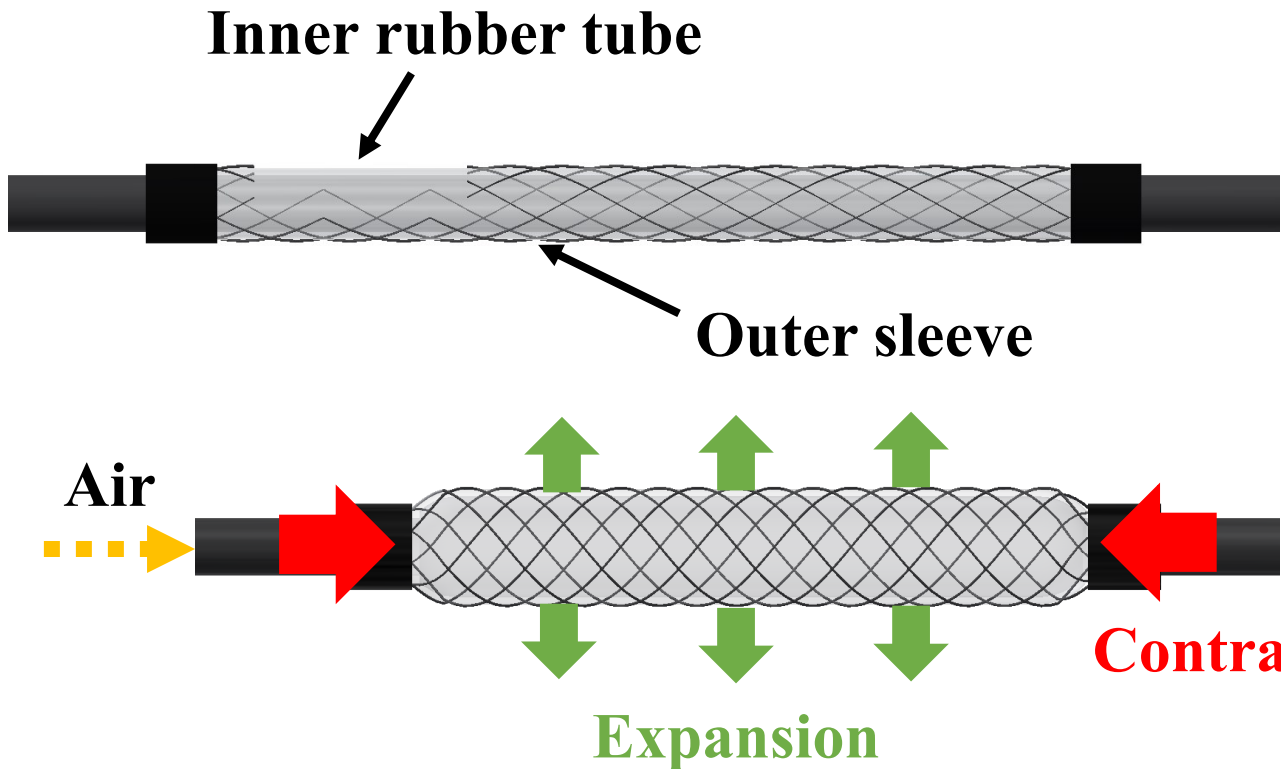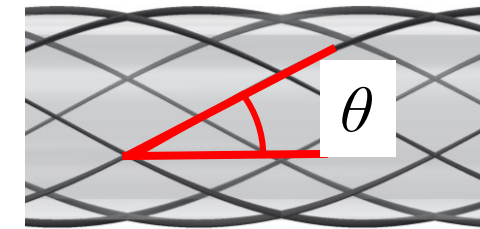

$\theta$ : Braiding angle

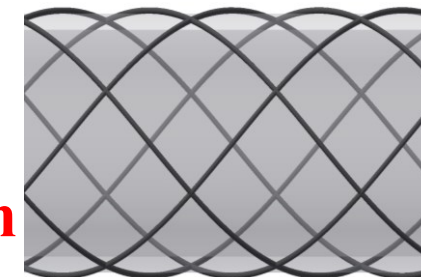

**Contraction**

# Production method of an active string

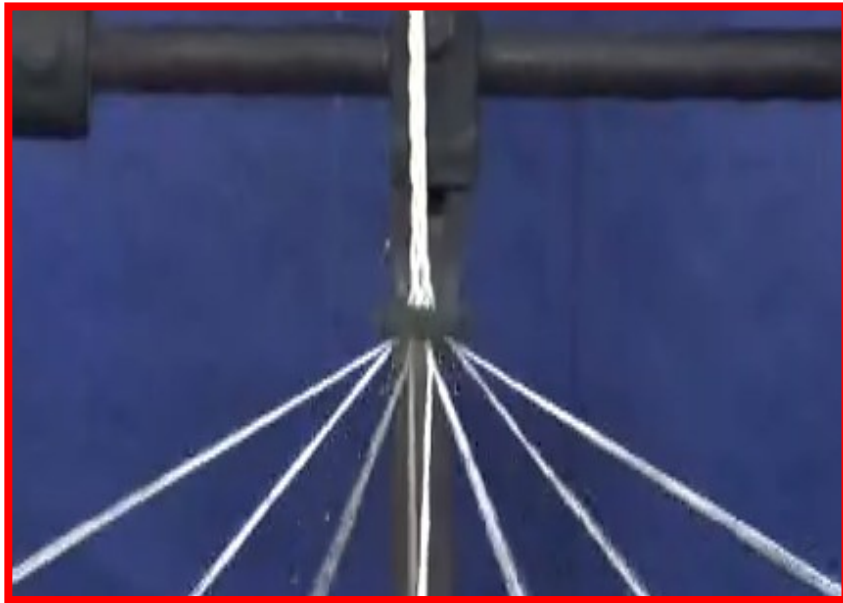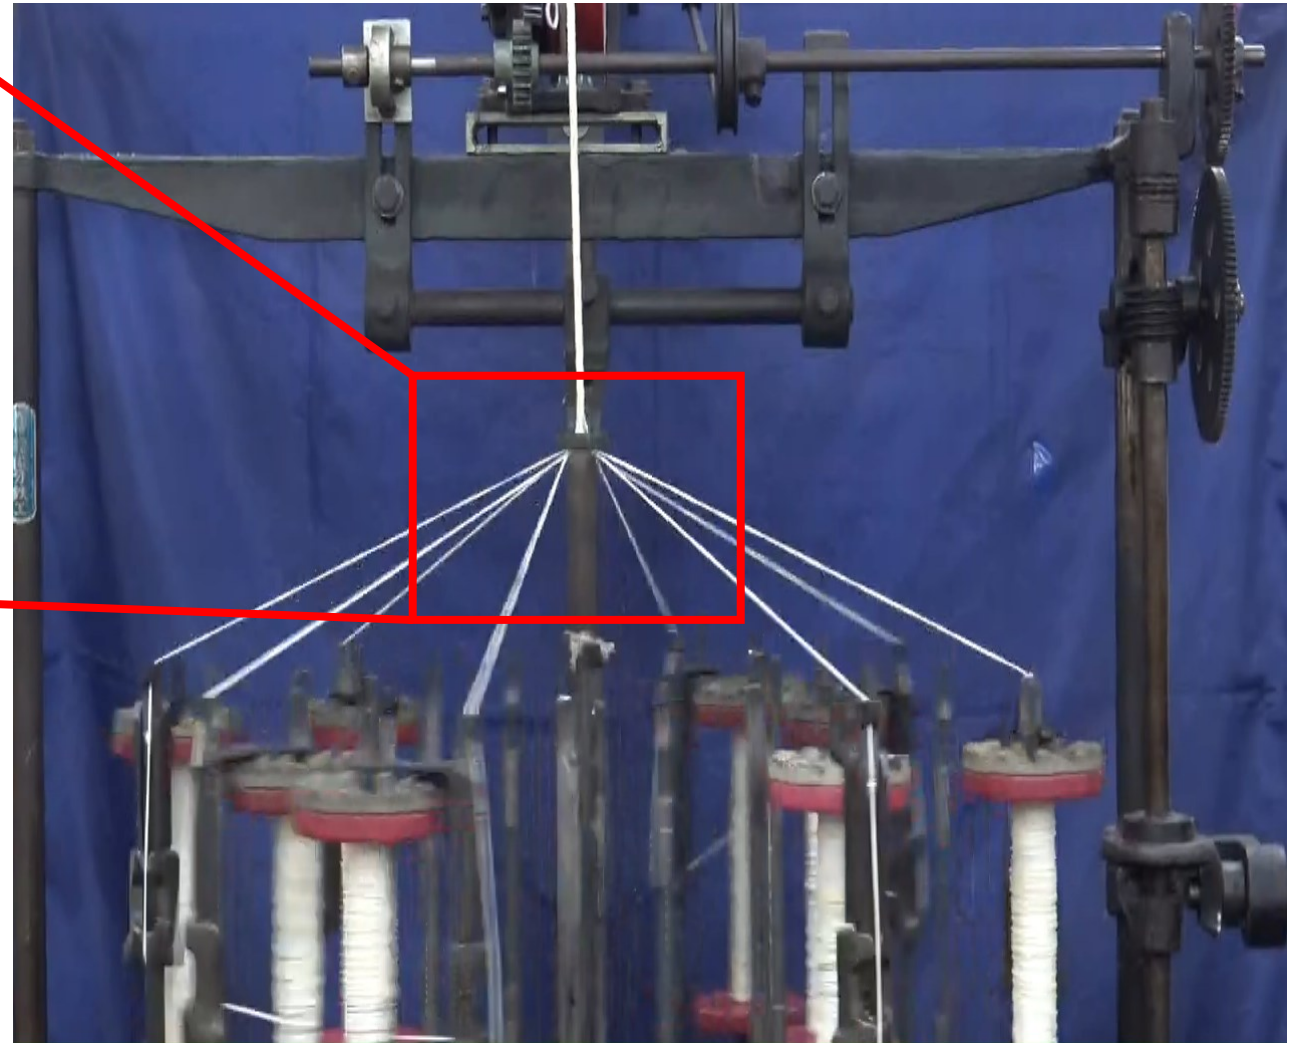

Setting **thin artificial muscles**  
on the bobbins to accumulate  
them in the **form of strings**

**Active string : High contraction ratio**  
**High flexibility [1]**

[1] Tian, W.; Wakimoto, S.; Kanda, T.; Yamaguchi, D. Fabrication of “Active String” using Thin Artificial Muscles by String Production Process, Mechanical Engineering Congress (MECJ-21), Online, Japan, 2021.9.5-8; S117-05(in Japanese).

# Problem of the active string

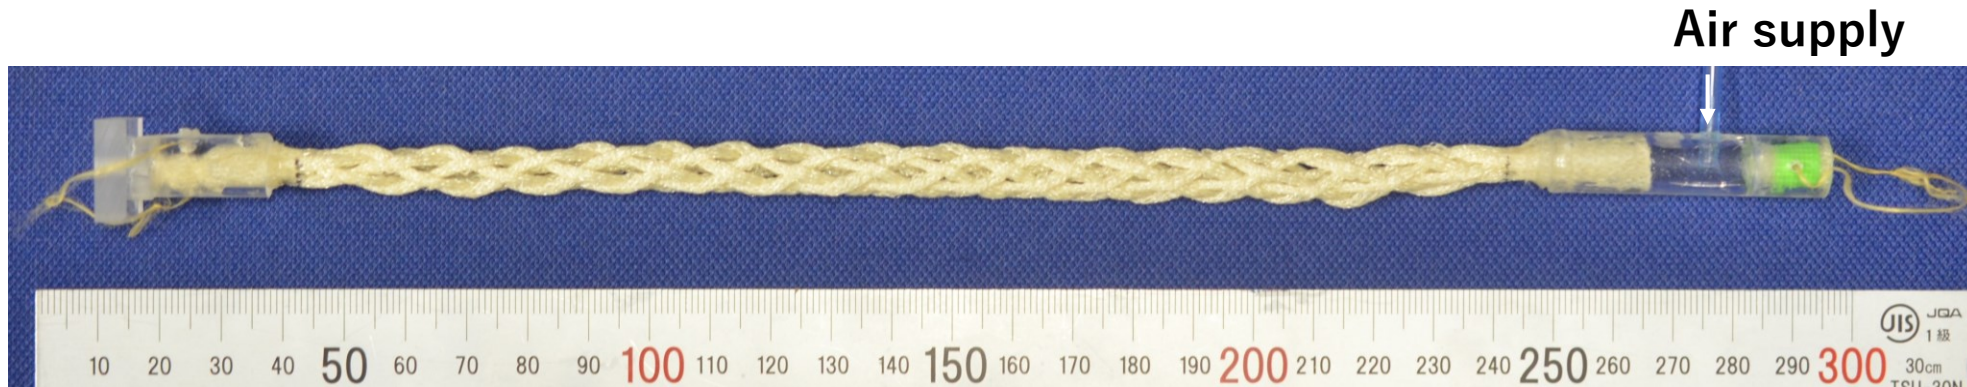

**Displacement control of the active string is challenging**

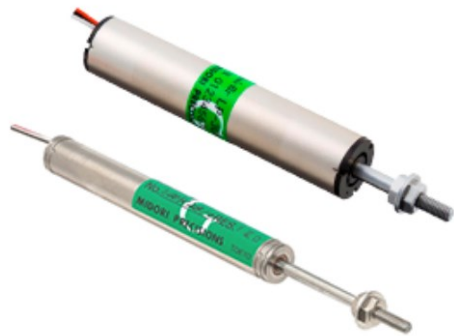

Linear potentiometer [1]

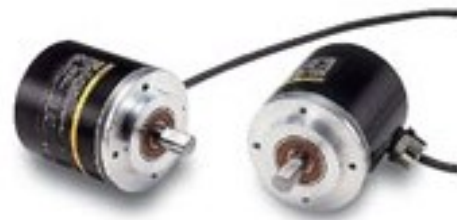

Encoder [2]

**Bulky and rigid** displacement sensors

**Difficulty of embedding**  
**Interfering the flexible motion**

[1] <https://www.midori.co.jp/products/lp-fj>

[2] <https://www.fa.omron.co.jp/products/family/490/>

# Production method of an active string

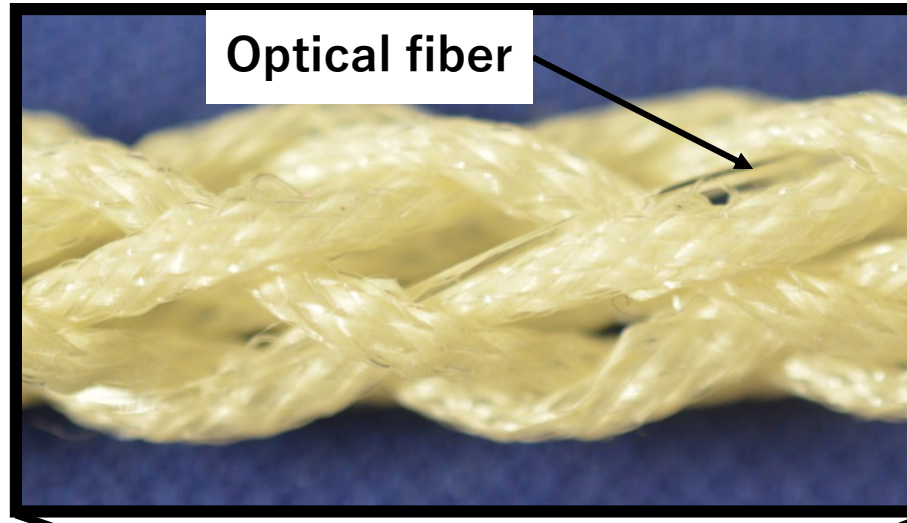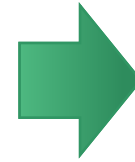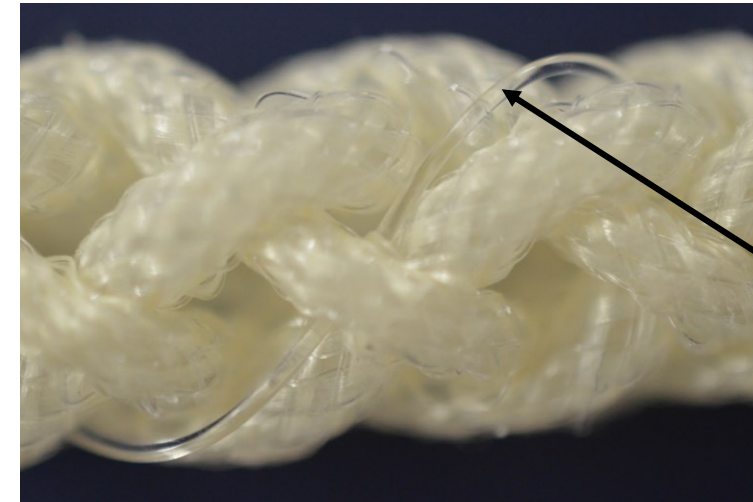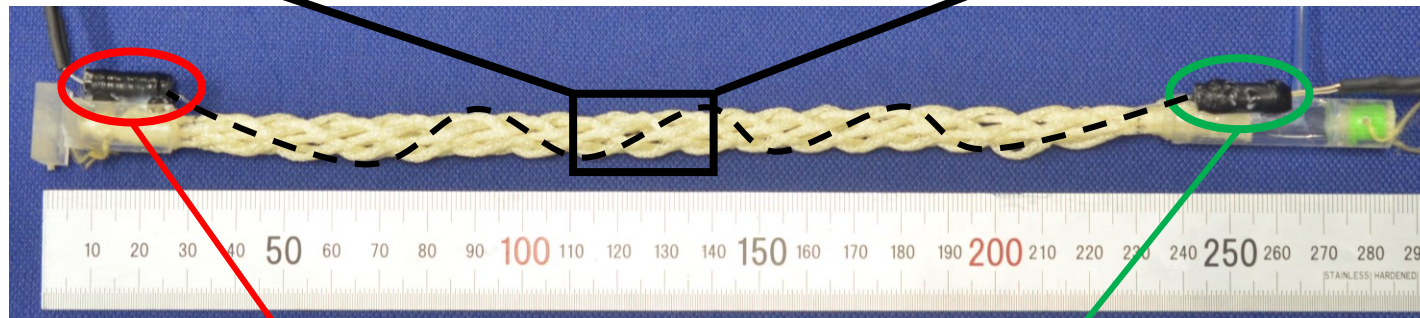

Combination of the optical fiber with the active string (black dashed line)

Contraction of the active string  
→ Decrease of radius of curvature of the optical fiber

Decrease of light propagating in the optical fiber due to **bending loss**

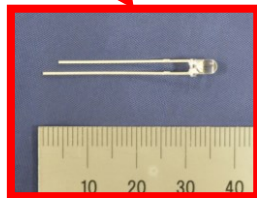

Emitting part : LED

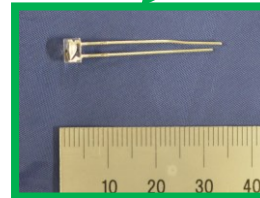

Receiving part : Photo IC Diode

# Results and Discussion

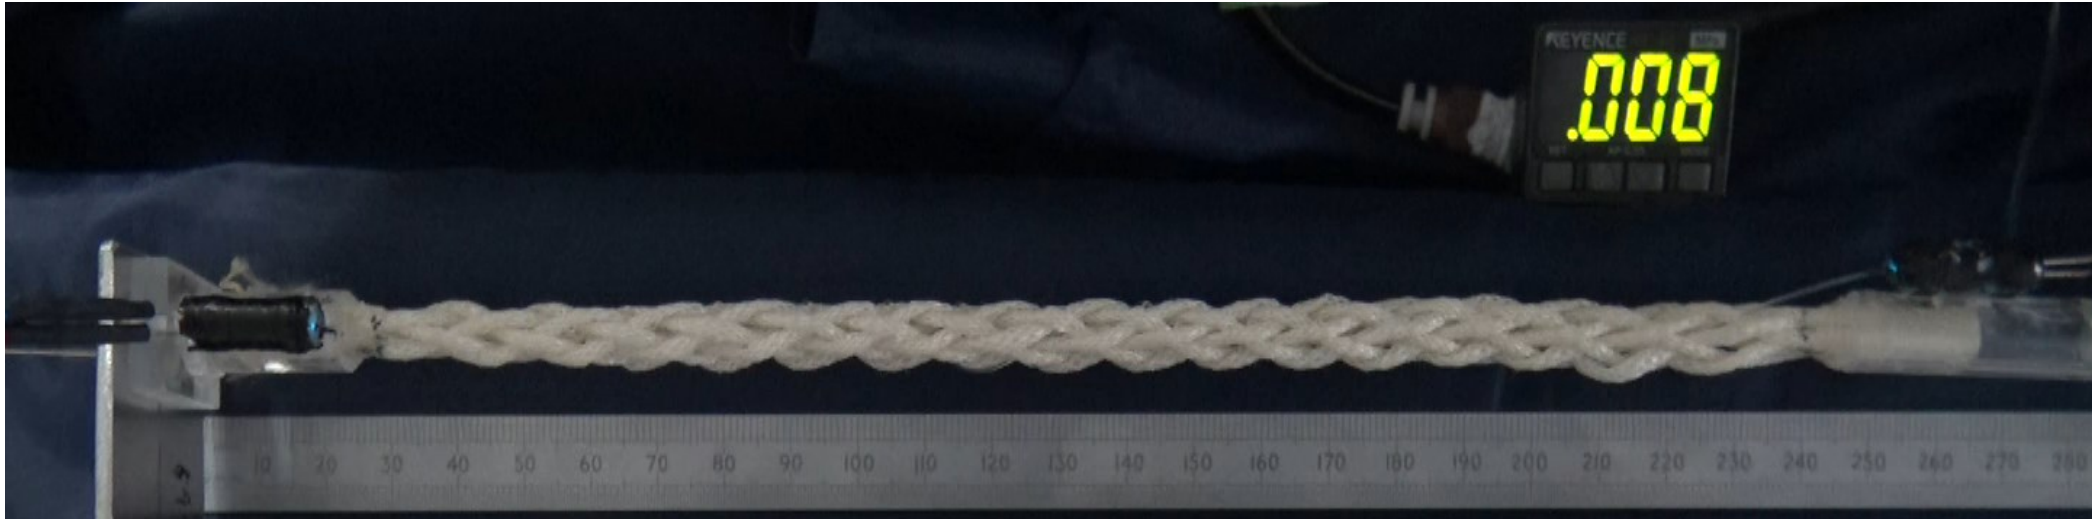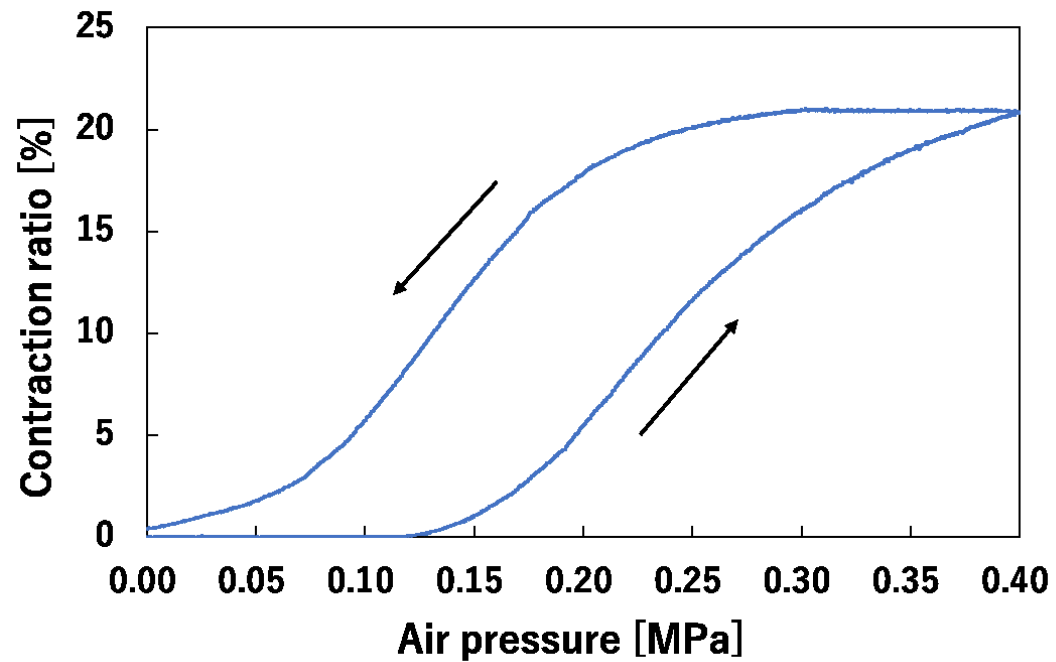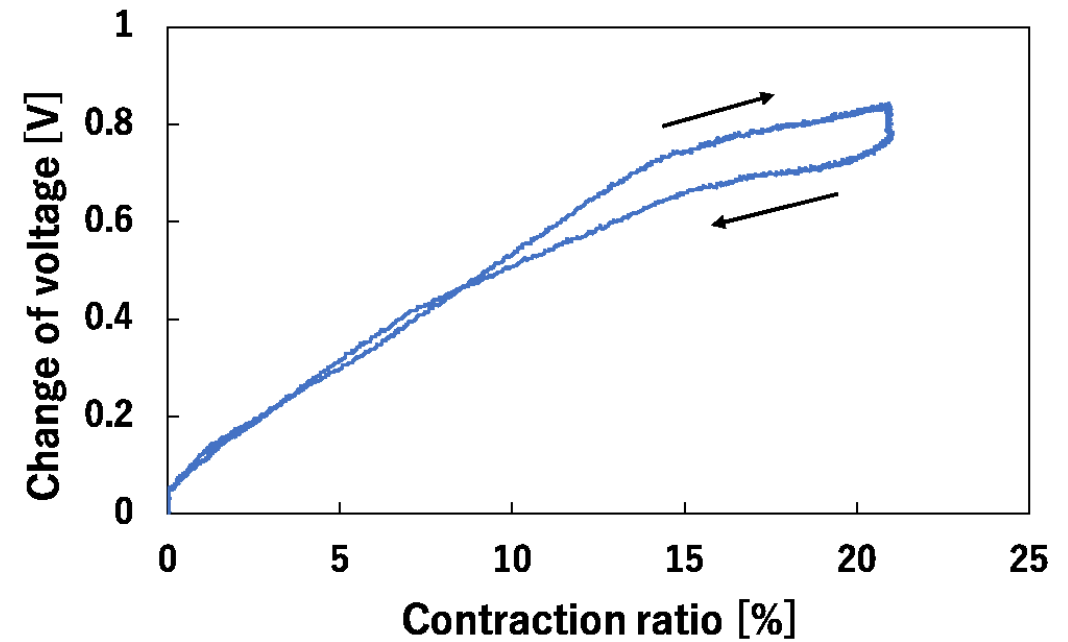

# Conclusions

- A flexible optical fiber sensor is combined with the active string to enable sensing of its displacement.
- The experimental results showed that the sensor value of the optical fiber sensor changed with corresponding to the displacement of the active string.

**Possibility of displacement estimation of the active string by combining the optical fiber sensor with the active string can be found.**
